# Supplementary material
Source: publisher site journal article supplement (https://www.dovepress.com/article/461821)
Supplement: Supplementary file 1 [file get_supplementary_file.php]

**Table S1** Impact of Regular and Functionally Enriched Chicken Egg Consumption (Nutri 4) on Serum Free Fatty Acid Profile in Patients with Acute Coronary Syndrome

| Parameter | | Control | |  | Nuti4 | |  | Absolute Change after Dietary Protocol | |  |
| --- | --- | --- | --- | --- | --- | --- | --- | --- | --- | --- |
| Before | After | *pa* | Before | After | *pa* | Control | Nuti4 | *pb* |
| SFA (μmol/L) | |  |  |  |  |  |  |  |  |  |
|  | C10:0 Capric acid | 8.3 ±18.6 | 11.8 ±26.3 | 0.374 | 16.4 ± 20.9 | 18.7 ±28.1 | 0.788 | 3.5 ±7.8 | 2.3 ±18.3 | 0.903 |
|  | C12:0 Lauric acid | 37.1 [0.0-38.4] | 17.5 ±27.8 | 0.625 | 17.9 ±25.6 | 27.1 ±39.4 | 0.556 | -18.9 ±65.3 | 9.2 ±32.1 | 0.412 |
|  | C14:0 Myristic acid | 101.1 ±73.0 | 73.9 ±11.5 | 0.454 | 118.9 ±85.9 | 114.9 ±84.2 | 0.904 | -27.2 ±73.3 | -4.0 ±70.0 | 0.624 |
|  | C15:0 Pentadecanoic acid | 21.4 ±7.7 | 17.9 ±5.1 | 0.141 | 23.5 ±11.3 | 20.5 ±9.3 | 0.167 | -3.5 ±4.3 | -3.0 ±4.0 | 0,857 |
|  | C16:0 Palmitic acid | 2069.4 ±297.5 | 1780.2 ±277.7 | 0.274 | 2087.0 ±346.2 | 1888.6 ±313.1 | 0.123 | -289.2 ±510.6 | -198.4 ±227.3 | 0,726 |
|  | C17:0 Margaric acid | 26.0 ±7.2 | 21.7 ±5.0 | 0.081 | 26.5 ±9.2 | 24.0 ±6.6 | 0.172 | -4.3 ±4.2 | -2.5 ±3.4 | 0.472 |
|  | C18:0 Stearic acid | 813.0 ±155.3 | 764.0 ±59.0 | 0.456 | 767.8 ±98.9 | 757.3 ±72.2 | 0.767 | -48.9 ±132.9 | -10.5 ±74.0 | 0.587 |
|  | C22:0 Behenic acid | 6.7 ±9.2 | 3.2 ±7.2 | 0.384 | 6.6 ±9.1 | 6.4 ±8.8 | 0.582 | -3.5 ±7.9 | -0.2 ±0.7 | 0.385 |
| PUFA (μmol/L) | |  |  |  |  |  |  |  |  |  |
| n-5 | C14:1[cis-9] Myristoleic acid | 5.6 ±8.2 | 0.0 ±0.0 | 0.199 | 5.4 ±12.1 | 8.3 ±11.5 | 0.504 | -5.6 ±8.2 | 2.8 ±8.7 | 0.151 |
| n-7 | C16:1[cis-9] Palmitoleic acid | 224.0 ±121.1 | 97.8 ±21.6 | 0.084 | 230.4 ±76.2 | 168.5 ±59.1 | 0.121 | -126.1 ±123.1 | -61.8 ±70.5 | 0.340 |
|  | C17:1[cis-10] cis-10-Heptadecenoic acid | 17.4 ±1.0 | 5.4 ±7.5 | 0.022 | 10.9 ±11.8 | 17.2 [11.5-18.8] | 0.313 | -12.0 ±7.4 | 15 [‑1.5-17.2] | 0.008 |
| n-9 | C18:1[cis-9] Oleic acid | 1452.0 ±444.8 | 1066.7 ±194.2 | 0.091 | 1280.9 ±278.2 | 1158.5 ±131.1 | 0.181 | -385.3 ±388.2 | -122.4 ±169.1 | 0.202 |
|  | C20:1[cis-11] 11-Eicosenoic acid | 16.7 ±4.3 | 13.8 ±2.4 | 0.158 | 14.3 ±4.4 | 14.7 ±3.7 | 0.654 | -2.9 ±3.8 | 0.4 ±1.8 | 0.114 |
|  | C24:1[cis-15] Nervonic acid | 7.0 [6.7-7.0] | 5.8 ±5.6 | 0.813 | 7.8 ±4.9 | 6.7 ±4.6 | 0.106 | -2.0 ±4.4 | ‑0.6 [‑2.1- ‑0.2] | 0.690 |
| n-6 | C18:2[cis-9,12] Linoleic acid | 1848.7 ±541.4 | 1669.5 ±356.8 | 0.620 | 1601.3 [1568.8-2123.4] | 1722.8 ±653.9 | 0.188 | -179.2 ±747.8 | -436.5 ±536.8 | 0.549 |
|  | C18:3[cis-6,9,12] γ-Linolenic acid | 65.4 ±48.9 | 34.1 ±3.5 | 0.209 | 62.0 ±32.1 | 47.6 ±17.8 | 0.448 | -31.3 ±46.8 | -14.4 ±38.3 | 0.550 |
|  | C21:2[cis-11,14] Eicosadienoic acid | 18.2 ±2.7 | 17.5 ±1.1 | 0.502 | 21.3 ±8.6 | 19.6 ±5.1 | 0.353 | -0.7 ±2.2 | -0.3 [‑0.4-0.2] | 1.000 |
|  | C20:3[cis-8,11,14] Dihomo-γ-linolenic acid | 166.6 ±87.9 | 149.1 ±82.1 | 0.289 | 187.1 ±76.9 | 142.5 ±56.4 | 0.198 | -17.6 ±32.1 | -19.7 [‑35.2- ‑15.5] | 1.000 |
|  | C20:4[cis-5,8,11,14] Arachidonic acid | 645.7 ±151.1 | 605.8 ±139.3 | 0.510 | 579.1 [548.5-6252] | 521.2 [511.9-594.0] | 0.063 | -76.5 [-93.9- ‑69.7] | -36.6 [-79.2- ‑31.2] | 0.841 |
| n-3 | C18:3[cis-9,12,15] α-Linolenic acid | 21.0 ±5.9 | 22.8 ±5.0 | 0.706 | 21.9 ±5.5 | 31.9 ±15.8 | 0.160 | 1.8 ±9.9 | 10.0 ±12.9 | 0.294 |
|  | C20:4[cis-5,8,11,14] Eicosapentaenoic acid | 21.9 ±4.1 | 22.5 ±9.8 | 0.867 | 24.4 [18.2-27.6] | 31.6 ±12.4 | 0.813 | 0.6 ±7.8 | -0.5 ±14.5 | 0.884 |
|  | C22:6[cis-4,7,10,13,16,19] cis-4,7,10,13,16,19-Docosahexaenoic acid | 105.1 [104.7-123.8] | 135.9 ±84.4 | 0.813 | 136.2 ±67.4 | 188.9 ±77.5 | 0.180 | 3.0 ±26.8 | 52.7 ±72.7 | 0.189 |
| n-6 / n-3 PUFAs | | 17.1 ±6.61 | 15.7 ±6.61 | 0.692 | 17.8 ±7.638 | 11.5 ±5.93 | 0.032 | -1.4 ±6.5 | -6.3 ±3.9 | 0.230 |

**Notes:** Results are expressed as the mean value and (standard deviation) for normally distributed data or as the median and [interquartile range] for non-normally distributed data. Bold p-values indicate statistically significant differences (p<0.05), with *p*a representing within-group differences (paired t-test or Wilcoxon signed-rank test), and *p*b representing between-group differences (independent samples t-test or Mann-Whitney U test)

**Abbreviations:** Nutri 4, Chicken eggs enriched with n-3 PUFA, selenium, vitamin E, and lutein; SFA, Saturated fatty acids; PUFA, Polyunsaturated fatty acids.
